# Supplementary material for: How Structured Is the Entangled Bank? The Surprisingly Simple Organization of Multiplex Ecological Networks Leads to Increased Persistence and Resilience
Source: PLOS journal article supplement (doi:10.1371/journal.pbio.1002527), 2016-08-03
Supplement: S15 (10.1371/journal.pbio.1002527.s015) [file journal.pbio.1002527.s015]

(listing pending)
